# Supplementary material
Source: publisher figshare collection journal article supplement (https://asha.figshare.com/articles/dataset/_/19191278)
Supplement: Supplementary file 1 [file 1]

**Supplemental Material S4.** Estimates from Z-scored LSA predictors and language outcome measures.

| <b>Spanish Measures</b> |                  |                     |              |             |              |
|-------------------------|------------------|---------------------|--------------|-------------|--------------|
| Parallel table          | LSA measure      | Sentence repetition |              | Vocabulary  |              |
|                         |                  | <i>Est.</i>         | 95% CI       | <i>Est.</i> | 95% CI       |
| <b>Table 3</b>          | 1. MLU – Unique  | 0.33*               | 0.06 – 0.60  | 0.50*       | 0.21 – 0.79  |
|                         | 2. MLU – Retell  | 0.57*               | 0.23 – 0.91  | 0.51*       | 0.21 – 0.81  |
| <b>Table 4</b>          | 3. NDW – Unique  | 0.96*               | 0.53 – 1.40  | 1.15*       | 0.66 – 1.65  |
|                         | 4. NDW – Retell  | 1.35*               | 0.92 – 1.78  | 0.98*       | 0.55 – 1.42  |
| <b>Table 5</b>          | 5. PGU – Unique  | 0.37*               | 0.15 – 0.60  | 0.23        | -0.02 – 0.49 |
|                         | 6. PGU – Retell  | 0.38*               | 0.05 – 0.72  | 0.12        | -0.18 – 0.42 |
| <b>English Measures</b> |                  |                     |              |             |              |
| Parallel table          | LSA measure      | Sentence repetition |              | Vocabulary  |              |
|                         |                  | <i>Est.</i>         | 95% CI       | <i>Est.</i> | 95% CI       |
| <b>Table 6</b>          | 7. MLU – Unique  | 0.45*               | 0.10 – 0.80  | 0.43*       | 0.10 – 0.76  |
|                         | 8. MLU – Retell  | 0.59*               | 0.34 – 0.83  | 0.45*       | 0.21 – 0.69  |
| <b>Table 7</b>          | 9. NDW – Unique  | 0.50                | -0.01 – 1.01 | 0.74*       | 0.29 – 1.19  |
|                         | 10. NDW – Retell | 1.30*               | 0.89 – 1.72  | 1.20*       | 0.81 – 1.60  |
| <b>Table 8</b>          | 11. PGU – Unique | 0.64*               | 0.39 – 0.89  | 0.29        | -0.02 – 0.59 |
|                         | 12. PGU – Retell | 0.05                | -0.21 – 0.31 | 0.05        | -0.19 – 0.28 |

\*Denotes  $p < .05$ . Specific  $p$ -values are provided in Tables 1–6.
