# Supplementary material
Source: publisher figshare collection journal article supplement (https://asha.figshare.com/articles/dataset/_/19191278)
Supplement: Supplementary file 2 [file 1]

**Supplemental Material S2.** Unstandardized differences by elicitation technique in Spanish, controlling for age & TNU.

| <i>Predictors</i>                                   | Mean length of utterance |                        |                  | Number of different words |                        |                  | Proportion grammatical utterances |                        |                |
|-----------------------------------------------------|--------------------------|------------------------|------------------|---------------------------|------------------------|------------------|-----------------------------------|------------------------|----------------|
|                                                     | <i>Est.</i>              | <i>Conf. int (95%)</i> | <i>p-value</i>   | <i>Est.</i>               | <i>Conf. int (95%)</i> | <i>p-value</i>   | <i>Est.</i>                       | <i>Conf. int (95%)</i> | <i>p-value</i> |
| Intercept                                           | 2.93                     | 0.39 – 5.47            | .024             | 2.91                      | -19.58 – 25.41         | .800             | 0.75                              | 0.38 – 1.12            | < .001         |
| Age in years                                        | 0.24                     | -0.15 – 0.62           | .228             | 2.41                      | -1.08 – 5.90           | .177             | -0.01                             | -0.06 – 0.05           | .813           |
| Total number of utterances                          | <b>0.06</b>              | <b>0.04 – 0.08</b>     | <b>&lt; .001</b> | <b>1.53</b>               | <b>1.34 – 1.71</b>     | <b>&lt; .001</b> | -0.00                             | -0.00 – 0.00           | .604           |
| Elicitation<br>(unique story)                       | 0.16                     | -0.35 – 0.68           | .539             | <b>-5.31</b>              | <b>-10.03 – -0.59</b>  | <b>.027</b>      | -0.02                             | -0.10 – 0.06           | .647           |
| <b>Random Effects</b>                               |                          |                        |                  |                           |                        |                  |                                   |                        |                |
| $\sigma^2$                                          | 1.63                     |                        |                  | 137.29                    |                        |                  | 0.04                              |                        |                |
| $\tau_{00}$                                         | 0.16 <sub>Site</sub>     |                        |                  | 0.59 <sub>Site</sub>      |                        |                  |                                   |                        |                |
| ICC                                                 | 0.09                     |                        |                  | 0.001                     |                        |                  |                                   |                        |                |
| N                                                   | 2 <sub>Site</sub>        |                        |                  | 2 <sub>Site</sub>         |                        |                  | 2 <sub>Site</sub>                 |                        |                |
| Observations                                        | 96                       |                        |                  | 96                        |                        |                  | 96                                |                        |                |
| Marginal R <sup>2</sup> /Conditional R <sup>2</sup> | 0.247/0.315              |                        |                  | 0.741/0.742               |                        |                  | 0.006/NA                          |                        |                |
