# Supplementary material
Source: publisher figshare collection journal article supplement (https://asha.figshare.com/articles/dataset/_/19191278)
Supplement: Supplementary file 3 [file 1]

**Supplemental Material S3.** Unstandardized differences by elicitation technique in English, controlling for age & TNU.

| <i>Predictors</i>                                       | Mean length of utterance |                    |                  | Number of different words |                     |                  | Proportion grammatical utterances |                    |                  |
|---------------------------------------------------------|--------------------------|--------------------|------------------|---------------------------|---------------------|------------------|-----------------------------------|--------------------|------------------|
|                                                         | <i>Est.</i>              | <i>CI (95%)</i>    | <i>p-value</i>   | <i>Est.</i>               | <i>CI (95%)</i>     | <i>p-value</i>   | <i>Est.</i>                       | <i>CI (95%)</i>    | <i>p-value</i>   |
| Intercept                                               | -0.13                    | -2.75 – 2.49       | .922             | -37.22                    | -64.31 – -10.14     | .007             | -0.23                             | -0.69 – 0.22       | .315             |
| Age in years                                            | <b>0.83</b>              | <b>0.41 – 1.25</b> | <b>&lt; .001</b> | <b>8.96</b>               | <b>4.52 – 13.41</b> | <b>&lt; .001</b> | <b>0.14</b>                       | <b>0.07 – 0.21</b> | <b>&lt; .001</b> |
| Total number of utterances                              | <b>0.04</b>              | <b>0.02 – 0.06</b> | <b>&lt; .001</b> | <b>1.56</b>               | <b>1.35 – 1.76</b>  | <b>&lt; .001</b> | 0.00                              | -0.00 – 0.01       | .234             |
| Elicitation (unique story)                              | -0.01                    | -0.56 – 0.55       | .984             | -5.79                     | -11.60 – 0.01       | .051             | -0.02                             | -0.11 – 0.07       | .722             |
| <b>Random Effects</b>                                   |                          |                    |                  |                           |                     |                  |                                   |                    |                  |
| $\sigma^2$                                              | 2.04                     |                    |                  | 228.65                    |                     |                  | 0.05                              |                    |                  |
| $\tau_{00}$                                             | 0.09 <sub>Site</sub>     |                    |                  |                           |                     |                  | 0.01 <sub>Site</sub>              |                    |                  |
| ICC                                                     | 0.04                     |                    |                  |                           |                     |                  | 0.19                              |                    |                  |
| N                                                       | 2 <sub>Site</sub>        |                    |                  | 2 <sub>Site</sub>         |                     |                  | 2 <sub>Site</sub>                 |                    |                  |
| Observations                                            | 108                      |                    |                  | 108                       |                     |                  | 108                               |                    |                  |
| Marginal R <sup>2</sup> /<br>Conditional R <sup>2</sup> | 0.316/0.344              |                    |                  | 0.755/NA                  |                     |                  | 0.150/0.312                       |                    |                  |
