# Supplementary material
Source: publisher figshare collection journal article supplement (https://asha.figshare.com/articles/dataset/_/19191278)
Supplement: Supplementary file 4 [file 1]

**Supplemental Material S1.** Descriptive information for the sample by language and elicitation technique.

**Descriptive Statistics for Children Completing Narratives in Spanish ( $n = 96$ )**

|                  | Spanish: Unique Story |           |                | Spanish: Story Retell |           |                |
|------------------|-----------------------|-----------|----------------|-----------------------|-----------|----------------|
|                  | <i>M</i>              | <i>SD</i> | <i>Min–Max</i> | <i>M</i>              | <i>SD</i> | <i>Min–Max</i> |
| Age              | 6.31                  | 0.70      | 5.17–7.37      | 6.26                  | 0.66      | 5.25–7.83      |
| TNU–Spanish      | 26.02                 | 13.79     | 2–69           | 23.57                 | 12.32     | 3–59           |
| NDW–Spanish      | 52.56                 | 23.13     | 3–94           | 54.84                 | 25.66     | 12–149         |
| MLU–Spanish      | 6.14                  | 1.69      | 2.00–9.10      | 5.80                  | 1.31      | 2.44–8.15      |
| PGU–Spanish      | 0.67                  | 0.21      | 0.13–1.00      | 0.69                  | 0.17      | 0.29–1.00      |
| English Vocab    | 95.64                 | 20.05     | 55–135         | 98.72                 | 15.18     | 55–126         |
| Spanish Vocab    | 85.69                 | 16.40     | 55–129         | 81.40                 | 18.02     | 55–118         |
| Conceptual Vocab | 103.57                | 16.52     | 66–136         | 102.35                | 14.78     | 62–126         |
| English SR       | 93.11                 | 17.65     | 60–115         | 90.27                 | 18.48     | 55–115         |
| Spanish SR       | 94.59                 | 12.93     | 70–120         | 87.09                 | 16.52     | 55–115         |

**Descriptive Statistics for Children Completing Narratives in English ( $n = 108$ )**

|                  | English: Unique Story |           |                | English: Story Retell |           |                |
|------------------|-----------------------|-----------|----------------|-----------------------|-----------|----------------|
|                  | <i>M</i>              | <i>SD</i> | <i>Min–Max</i> | <i>M</i>              | <i>SD</i> | <i>Min–Max</i> |
| Age              | 6.35                  | 0.68      | 5.17–7.42      | 6.28                  | 0.72      | 5.25–7.83      |
| TNU–English      | 23.43                 | 14.42     | 1–77           | 24.84                 | 16.15     | 29983.00       |
| NDW–English      | 56.19                 | 30.78     | 1–126          | 52.02                 | 30.10     | 3–134          |
| MLU–English      | 5.98                  | 1.86      | 1–8.82         | 6.06                  | 1.73      | 1.50–9.03      |
| PGU–English      | 0.71                  | 0.27      | 0–1.00         | 0.67                  | 0.26      | 0.20–1.00      |
| English Vocab    | 96.04                 | 17.50     | 55–135         | 102.45                | 16.05     | 67–145         |
| Spanish Vocab    | 81.98                 | 16.98     | 55–129         | 77.00                 | 16.91     | 55–111         |
| Conceptual Vocab | 101.53                | 16.09     | 64–136         | 105.82                | 14.64     | 74–145         |
| English SR       | 93.78                 | 15.92     | 60–115         | 93.14                 | 17.49     | 60–115         |
| Spanish SR       | 90.83                 | 16.45     | 55–120         | 83.14                 | 15.77     | 55–115         |

*Note.* *M* and *SD* are used to represent mean and standard deviation, respectively. TNU = total number of utterances; NDW = number of different utterances; MLU = mean length of utterance in words; PGU = proportion grammatical utterances; SR = Sentence repetition subtest of the Bilingual English-Spanish Assessment (Peña et al., 2014). All standardized assessment scores are norm referenced, but note that scores were not computed for children outside the normative age range.
